# Supplementary material for: Deciphering intra-species bacterial diversity of meat and seafood spoilage microbiota using gyrB amplicon sequencing: A comparative analysis with 16S rDNA V3-V4 amplicon sequencing
Source: PubMed Central journal article supplement (PMC6155546; doi:10.1371/journal.pone.0204629), 2018-09-25
Supplement: pone.0204629.s002.pdf [file pone.0204629.s002.pdf]

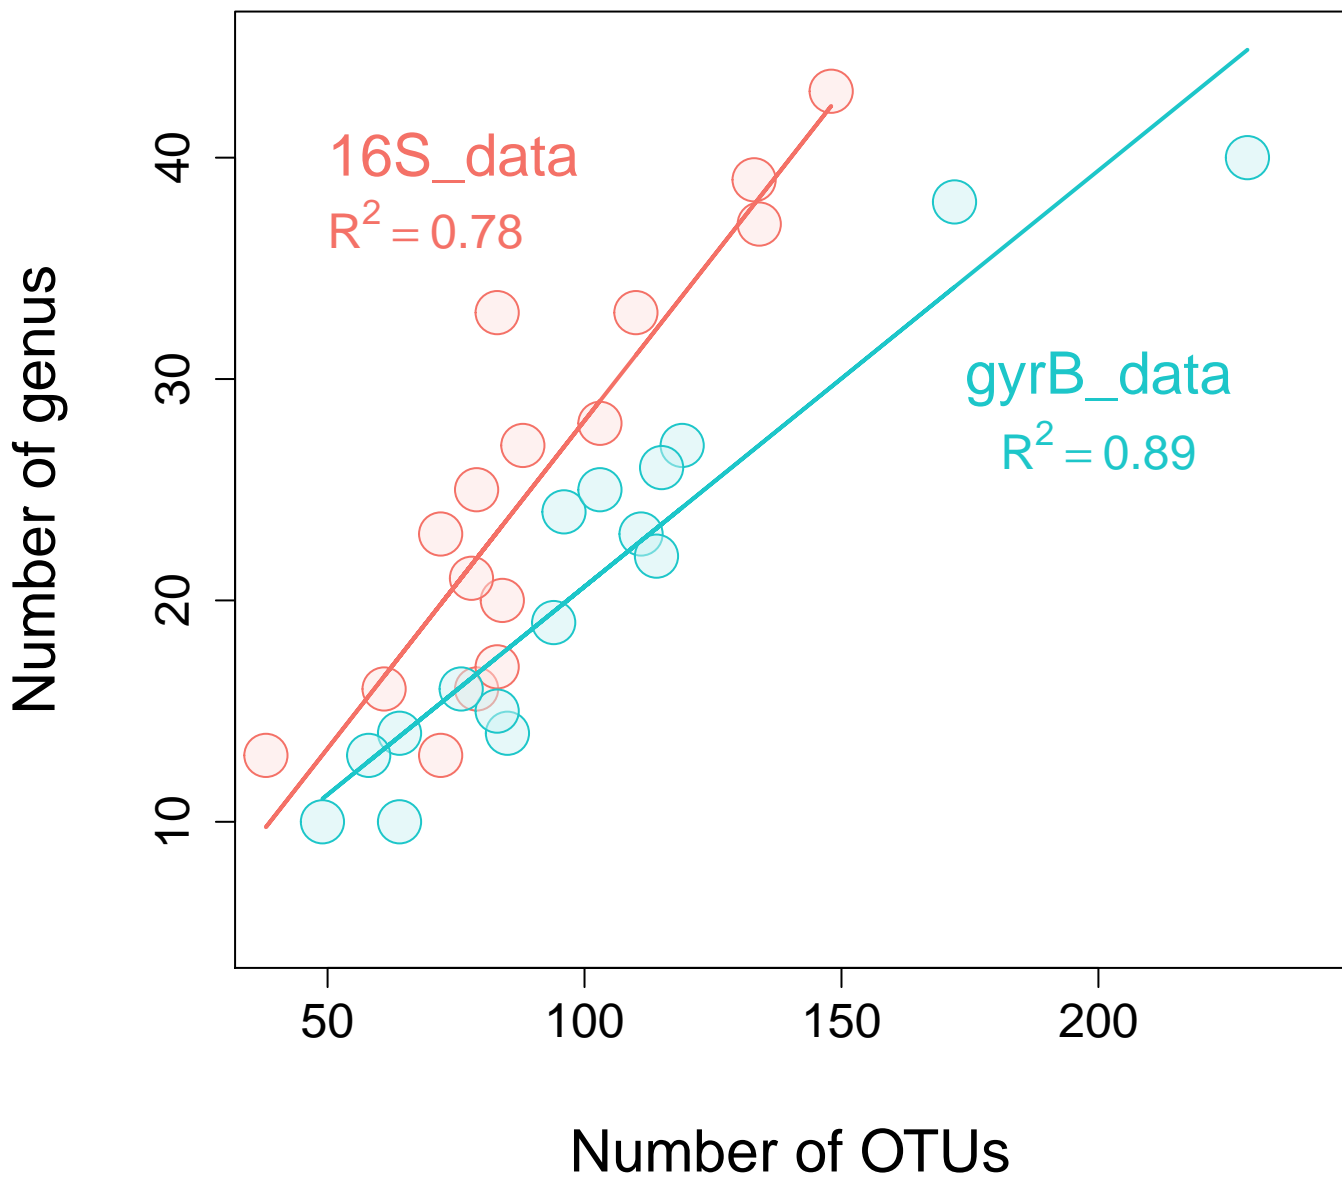

S1 Fig
